# Supplementary material for: Surface-observation-constrained high-frequency coal mine methane emissions in Shanxi, China, reveal more emissions than inventories, consistent with satellite inversion
Source: Copernicus journal article supplement (doi:10.5194/acp-25-5837-2025), 2025-06-12
Supplement: Supplementary file 1 [file acp-25-5837-2025-supplement.zip]

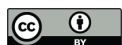

## *Supplement of*

# **Surface-observation-constrained high-frequency coal mine methane emissions in Shanxi, China, reveal more emissions than inventories, consistent with satellite inversion**

**Fan Lu et al.**

*Correspondence to:* Kai Qin ([qinkai@cumt.edu.cn](mailto:qinkai@cumt.edu.cn)) and Jason Blake Cohen ([jasonbc@alum.mit.edu](mailto:jasonbc@alum.mit.edu))

- [acp-25-5837-2025-supplement-title-page.pdf](#)
- Supplement
  - [Figure S1.png](#)
  - [Figure S2.png](#)
  - [Supplementary Materials.docx](#)

The copyright of individual parts of the supplement might differ from the article licence.
